# Supplementary material for: Investigation of the Side Chain Effect on Gas and Water Vapor Transport Properties of Anthracene-Maleimide Based Polymers of Intrinsic Microporosity
Source: MDPI journal article supplement (doi:10.3390/polym14010119), 2021-12-29
Supplement: s1 [file s1]

## Supplementary Information

# Investigation of the side chain effect on gas and water vapor transport properties of anthracene-maleimide based polymers of intrinsic microporosity

Esra Caliskan<sup>1</sup>, Sergey Shishatskiy<sup>1</sup>, Silvio Neumann<sup>1</sup>, Volker Abetz<sup>1,2</sup>, Volkan Filiz<sup>1,\*</sup>

<sup>1</sup> Helmholtz-Zentrum Hereon, Institute of Membrane Research, Max-Planck-Str. 1, 21502 Geesthacht, Germany

<sup>2</sup> University of Hamburg, Institute of Physical Chemistry, Martin-Luther-King-Platz 6, 20146 Hamburg, Germany

\* Correspondence: volkan.filiz@hereon.de; Tel.: +49-41-5287-2425

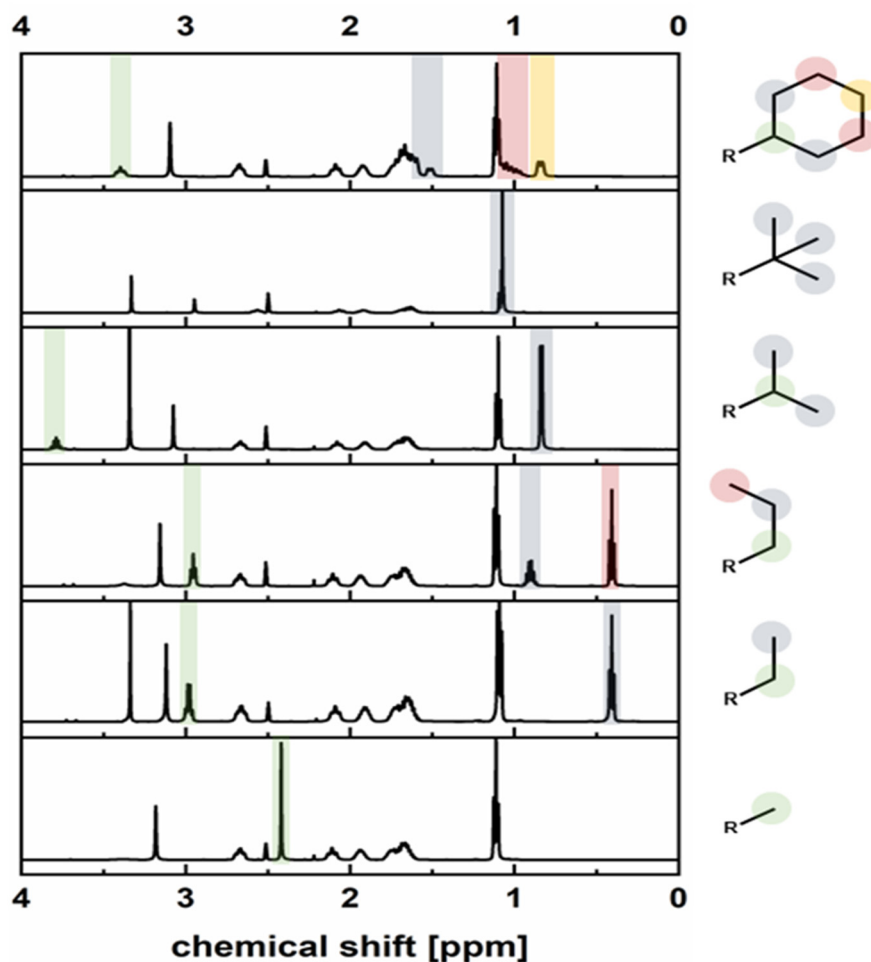

Figure S1. <sup>1</sup>H NMR spectra of all comonomers

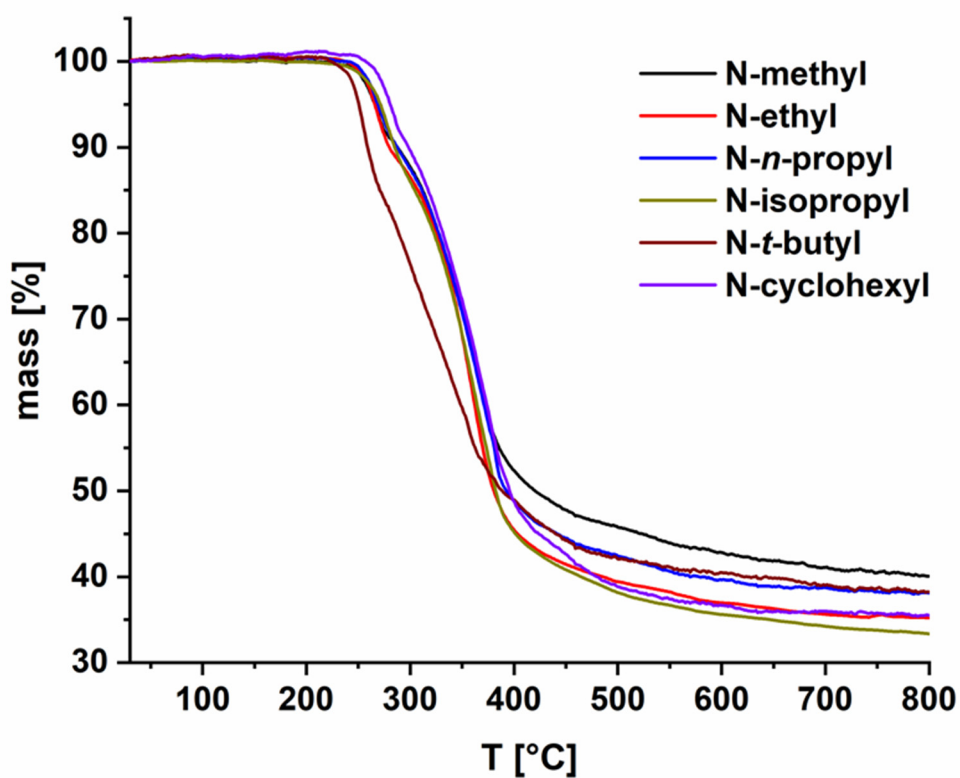

Figure S2. TGA curves of comonomers

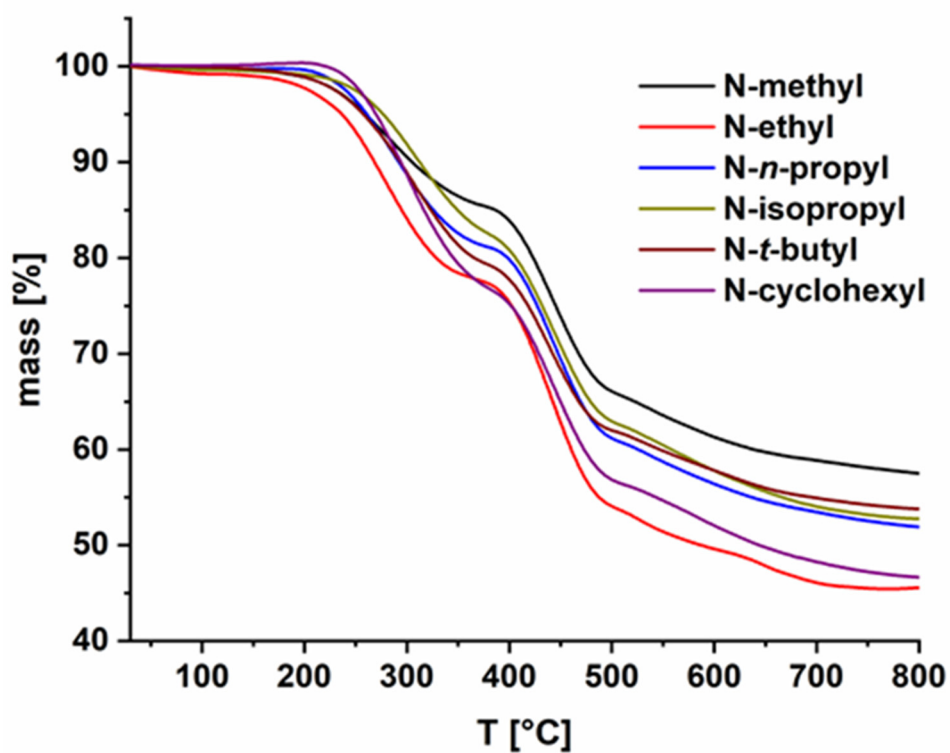

Figure S3. TGA curves of homopolymers

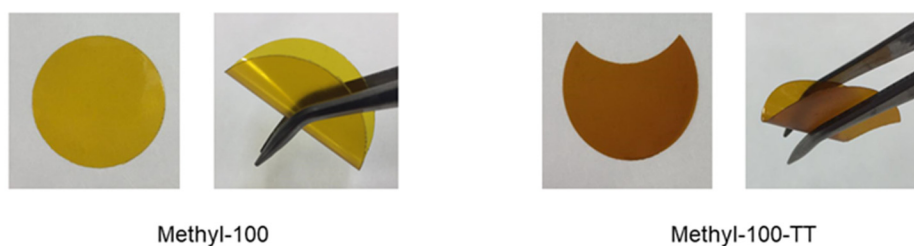

**Figure S4.** Optical images of methyl-100 before and after thermal treatments

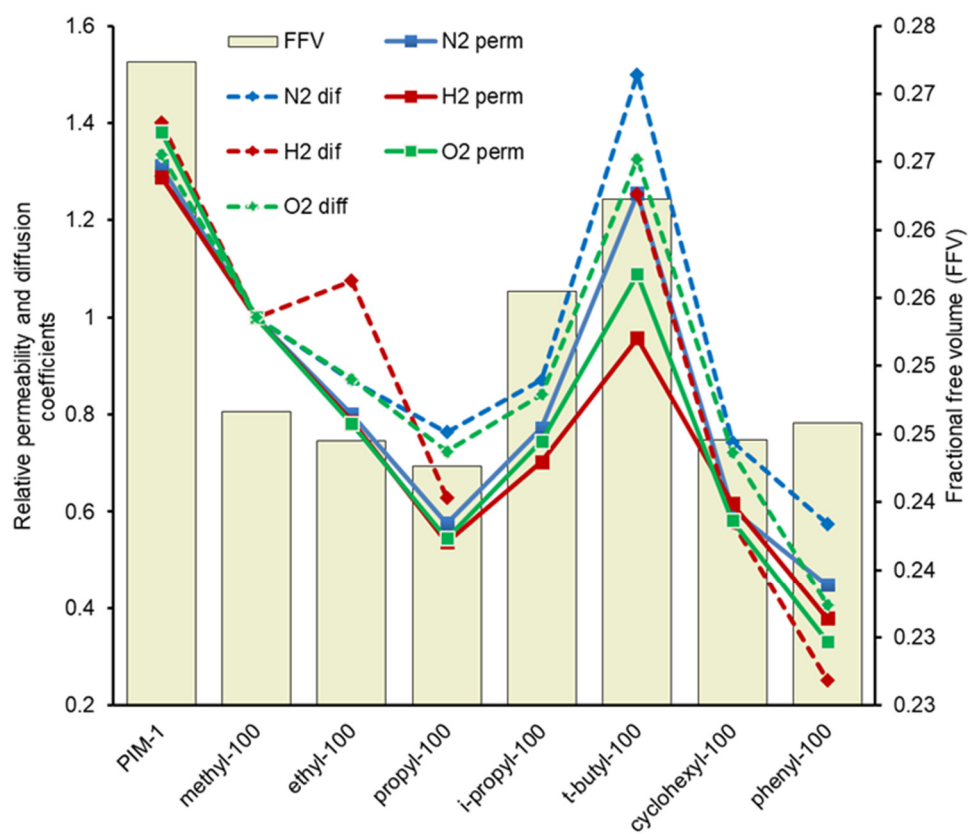

**Figure S5.** N<sub>2</sub>, O<sub>2</sub>, H<sub>2</sub> transport properties of homopolymers

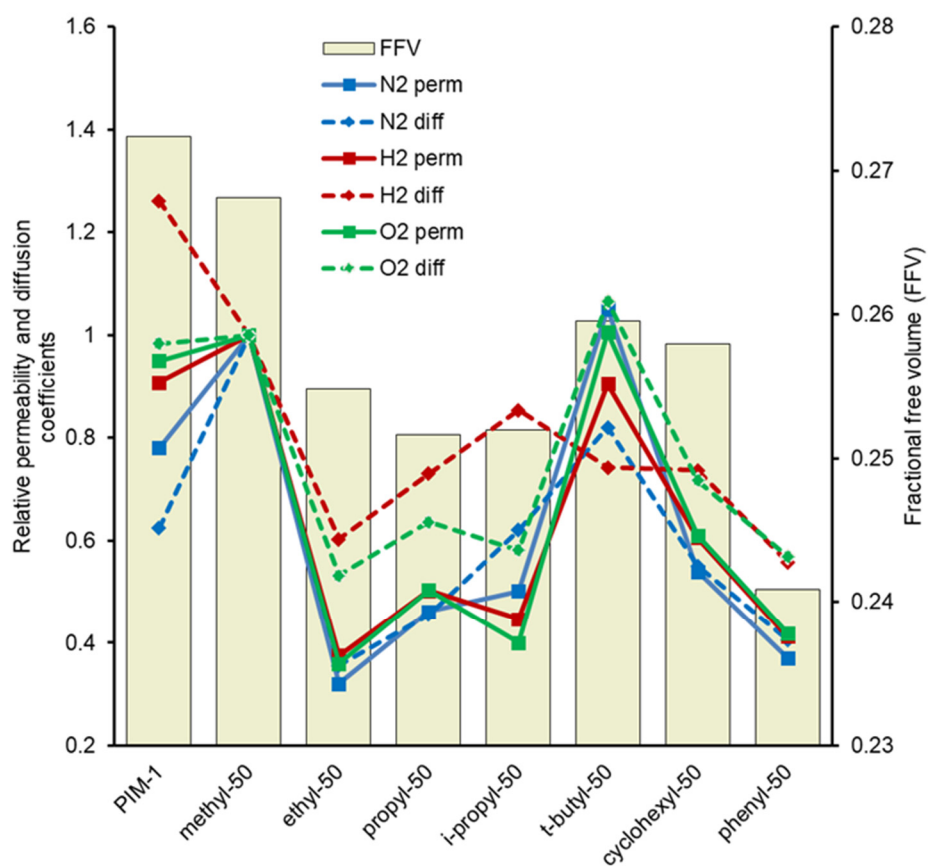

Figure S6. N<sub>2</sub>, O<sub>2</sub>, H<sub>2</sub> transport properties of copolymers

**Table S1.** Molecular weight data of polymers by GPC and polymer compositions calculated by  $^1\text{H}$  NMR

|                      | <b>M<sub>w</sub> (kg/mol) *</b> | <b>D</b> | <b>Comonomer amount (%) **</b> |
|----------------------|---------------------------------|----------|--------------------------------|
| methyl-100           | 45.9                            | 4.35     | -                              |
| methyl-50            | 85.5                            | 4.24     | 49                             |
| ethyl-100            | 52.9                            | 3.53     | -                              |
| ethyl-50             | 68.5                            | 3.49     | 50                             |
| propyl-100           | 38.2                            | 3.72     | -                              |
| propyl-50            | 75.1                            | 3.75     | 49                             |
| <i>i</i> -propyl-100 | 61.3                            | 3.73     | -                              |
| <i>i</i> -propyl-50  | 98.0                            | 4.32     | 48                             |
| <i>t</i> -butyl-100  | 78.4                            | 3.67     | -                              |
| <i>t</i> -butyl-50   | 97.1                            | 5.27     | 48                             |
| cyclohexyl-100       | 45.7                            | 3.51     | -                              |
| cyclohexyl-50        | 63.5                            | 3.44     | 48                             |
| phenyl-100           | 78.3                            | 3.43     | -                              |
| phenyl-50            | 76.3                            | 3.86     | 47                             |

**Table S2.** Permeability coefficients of PIM-1, homo- and copolymers determined at 30°C

|                       | Permeability (Barrer) |                |                |                 |                 |                  |
|-----------------------|-----------------------|----------------|----------------|-----------------|-----------------|------------------|
|                       | H <sub>2</sub>        | N <sub>2</sub> | O <sub>2</sub> | CO <sub>2</sub> | CH <sub>4</sub> | H <sub>2</sub> O |
| PIM-1                 | 2450                  | 300            | 950            | 6120            | 475             | 79300            |
| <i>Homopolymer</i>    |                       |                |                |                 |                 |                  |
| methyl-100            | 2160                  | 300            | 735            | 4990            | 445             | 110000           |
| ethyl-100             | 1500                  | 185            | 540            | 3860            | 290             | 87800            |
| propyl-100            | 1020                  | 135            | 375            | 2800            | 230             | 56300            |
| <i>i</i> -propyl -100 | 1340                  | 180            | 510            | 3680            | 290             | 64100            |
| <i>t</i> -butyl -100  | 1820                  | 290            | 750            | 5570            | 505             | 72500            |
| cyclohexyl -100       | 1170                  | 140            | 400            | 2860            | 240             | 46800            |
| phenyl-100            | 720                   | 105            | 230            | 1640            | 150             | 48600            |
| <i>Copolymer</i>      |                       |                |                |                 |                 |                  |
| methyl-50             | 2700                  | 390            | 995            | 6980            | 640             | 114500           |
| ethyl -50             | 1010                  | 125            | 360            | 2720            | 210             | 62700            |
| propyl -50            | 1360                  | 180            | 500            | 3610            | 300             | 60100            |
| <i>i</i> -propyl -50  | 1200                  | 190            | 400            | 2500            | 300             | 54800            |
| <i>t</i> -butyl -50   | 2440                  | 410            | 1010           | 7200            | 710             | 88500            |
| cyclohexyl-50         | 1630                  | 210            | 610            | 4280            | 370             | 60600            |
| phenyl-50             | 1110                  | 145            | 420            | 3210            | 240             | 56400            |

**Table S3.** Diffusion coefficients of PIM-1, homo- and copolymers determined at 30°C

|                      | Diffusion coefficient (*10 <sup>7</sup> ) |                |                |                 |                 |                  |
|----------------------|-------------------------------------------|----------------|----------------|-----------------|-----------------|------------------|
|                      | H <sub>2</sub> *                          | N <sub>2</sub> | O <sub>2</sub> | CO <sub>2</sub> | CH <sub>4</sub> | H <sub>2</sub> O |
| PIM-1                | 640                                       | 7.3            | 21.1           | 8.1             | 2.5             | 8.5              |
| <i>Homopolymer</i>   |                                           |                |                |                 |                 |                  |
| methyl-100           | 460                                       | 5.7            | 15.8           | 5.4             | 2.0             | 6.8              |
| ethyl-100            | 690                                       | 4.9            | 13.8           | 4.8             | 1.9             | 5.5              |
| propyl-100           | 290                                       | 4.3            | 11.4           | 4.2             | 1.7             | 4.6              |
| <i>i</i> -propyl-100 | -                                         | 4.9            | 13.3           | 5.1             | 1.9             | 6.5              |
| <i>t</i> -butyl-100  | 570                                       | 8.5            | 21.0           | 8.4             | 3.6             | 9.0              |
| cyclohexyl-100       | 270                                       | 4.2            | 11.4           | 4.3             | 1.7             | 5.7              |
| phenyl-100           | 120                                       | 3.3            | 6.4            | 2.3             | 1.2             | 1.5              |
| <i>Copolymer</i>     |                                           |                |                |                 |                 |                  |
| methyl-50            | 510                                       | 11.7           | 21.5           | 7.4             | 3.1             | 5.5              |
| ethyl-50             | 310                                       | 4.2            | 11.4           | 4.4             | 1.6             | 5.4              |
| propyl-50            | 370                                       | 5.3            | 13.7           | 5.1             | 1.9             | 6.6              |
| <i>i</i> -propyl-50  | 430                                       | 7.3            | 12.5           | 3.9             | 2.3             | 2.2              |
| <i>t</i> -butyl-50   | 380                                       | 9.6            | 22.9           | 9.8             | 4.4             | 5.2              |
| cyclohexyl-50        | 370                                       | 6.5            | 15.4           | 6.1             | 2.3             | 7.2              |
| phenyl-50            | 283                                       | 4.8            | 12.2           | 5.1             | 1.8             | 6.6              |

\* H<sub>2</sub> diffusion coefficient is given as indication only due to very short time-lag values

**Table S4.** Solubility coefficient of PIM-1, homo- and copolymers determined at 30°C

|                      | Solubility coefficient (*10 <sup>3</sup> ) |                |                |                 |                 |                  |
|----------------------|--------------------------------------------|----------------|----------------|-----------------|-----------------|------------------|
|                      | H <sub>2</sub>                             | N <sub>2</sub> | O <sub>2</sub> | CO <sub>2</sub> | CH <sub>4</sub> | H <sub>2</sub> O |
| PIM-1                | 3.9                                        | 40             | 45             | 760             | 190             | 9350             |
| <i>Homopolymer</i>   |                                            |                |                |                 |                 |                  |
| methyl-100           | 4.2                                        | 40             | 45             | 900             | 173             | 15250            |
| ethyl-100            | 2.4                                        | 40             | 40             | 800             | 153             | 15900            |
| propyl-100           | 3.6                                        | 30             | 33             | 675             | 140             | 12150            |
| <i>i</i> -propyl-100 | -                                          | 35             | 40             | 725             | 150             | 9850             |
| <i>t</i> -butyl-100  | 3.2                                        | 35             | 35             | 660             | 140             | 8100             |
| cyclohexyl-100       | 4.4                                        | 33             | 35             | 670             | 140             | 8300             |
| phenyl-100           | 6.3                                        | 30             | 35             | 715             | 125             | 33500            |
| <i>Copolymer</i>     |                                            |                |                |                 |                 |                  |
| methyl-50            | 5.6                                        | 40             | 47             | 940             | 210             | 21250            |
| ethyl-50             | 3.3                                        | 30             | 30             | 625             | 127             | 11350            |
| propyl-50            | 3.7                                        | 35             | 37             | 705             | 153             | 9150             |
| <i>i</i> -propyl-50  | 3.0                                        | 25             | 33             | 645             | 130             | 19300            |
| <i>t</i> -butyl-50   | 6.5                                        | 40             | 45             | 735             | 160             | 17250            |
| cyclohexyl-50        | 4.4                                        | 33             | 40             | 700             | 160             | 8400             |
| phenyl-50            | 3.9                                        | 30             | 35             | 630             | 130             | 8500             |

**Table S5.** Gas transport properties of methyl-100-TT\* determined at 30°C

|                                           | H <sub>2</sub> | N <sub>2</sub> | O <sub>2</sub> | CO <sub>2</sub> | CH <sub>4</sub> | H <sub>2</sub> O |
|-------------------------------------------|----------------|----------------|----------------|-----------------|-----------------|------------------|
| Permeability (Barrer)                     | 690            | 105            | 215            | 1410            | 155             | 32000            |
| Diffusion coefficient (10 <sup>7</sup> )  | 127            | 3.5            | 6.6            | 2.2             | 1.2             | 1.0              |
| Solubility coefficient (10 <sup>3</sup> ) | 5.4            | 30             | 33             | 640             | 125             | 34150            |

\*Thermal treatment at 250°C, 2h
